# Supplementary material for: Homozygous ALS-linked mutations in TARDBP/TDP-43 lead to hypoactivity and synaptic abnormalities in human iPSC-derived motor neurons
Source: PubMed Central journal article supplement — iScience. 2024 Feb 9;27(3):109166. doi: 10.1016/j.isci.2024.109166 (PMC10905001; doi:10.1016/j.isci.2024.109166), 2024-02-09
Supplement: mmc1.pdf [file mmc1.pdf]

**Supplemental information**

**Homozygous ALS-linked mutations in TARDBP/TDP-43  
lead to hypoactivity and synaptic abnormalities  
in human iPSC-derived motor neurons**

**Sarah Lépine, Angela Nauleau-Javaudin, Eric Deneault, Carol X.-Q. Chen, Narges Abdian, Anna Krystina Franco-Flores, Ghazal Haghi, María José Castellanos-Montiel, Gilles Maussion, Mathilde Chaineau, and Thomas Martin Durcan**

## Table of Contents

### I. Supplemental Figures

Figure S1. Validation of CRISPR/Cas9 gene editing by ddPCR

Figure S2. Characterization of *TARDBP* knock-in iPSCs

Figure S3. Characterization of iPSC-derived MNPCs and MNs

Figure S4. Equivalence testing with confidence intervals

Figure S5. Mutant MNs do not accumulate detergent-insoluble or phosphorylated TDP-43

Figure S6. TDP-43 variants do not exhibit changes in nucleocytoplasmic localization

Figure S7. Supplemental neuronal activity measurements recorded using multielectrode array

### II. Supplemental Tables

Table S1. Overview of iPSC lines used

Table S2. Sequences of sgRNAs and ssODNs used in making of *TARDBP* knock-in iPSC lines

Table S3. List of primers and affinity probes used for ddPCR or Sanger sequencing

Table S4. List of TaqMan probes

# I. Supplemental Figures

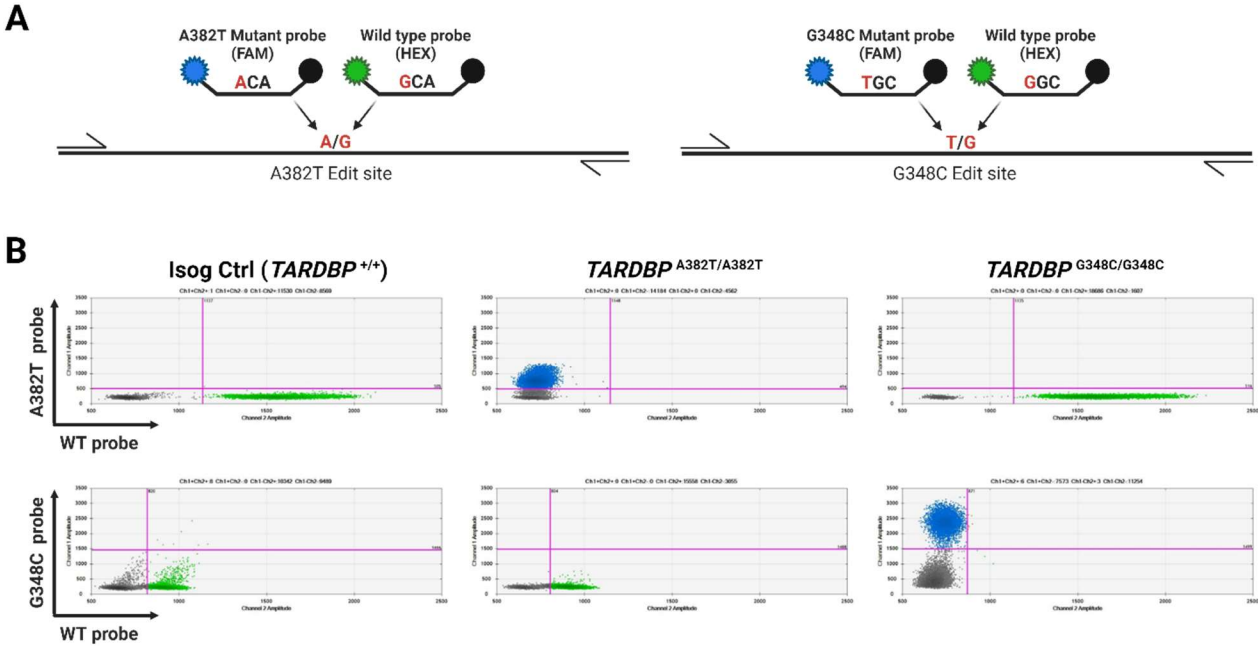

**Figure S1. Validation of CRISPR/Cas9 gene editing by ddPCR. Related to Figure 1.**

(A and B) Pairs of mutant (FAM, blue) and wild-type (HEX, green) probes designed to target the edited or wild-type alleles, respectively (A). ddPCR scatter plots confirming correct gene editing and homozygosity of iPSC lines (B).

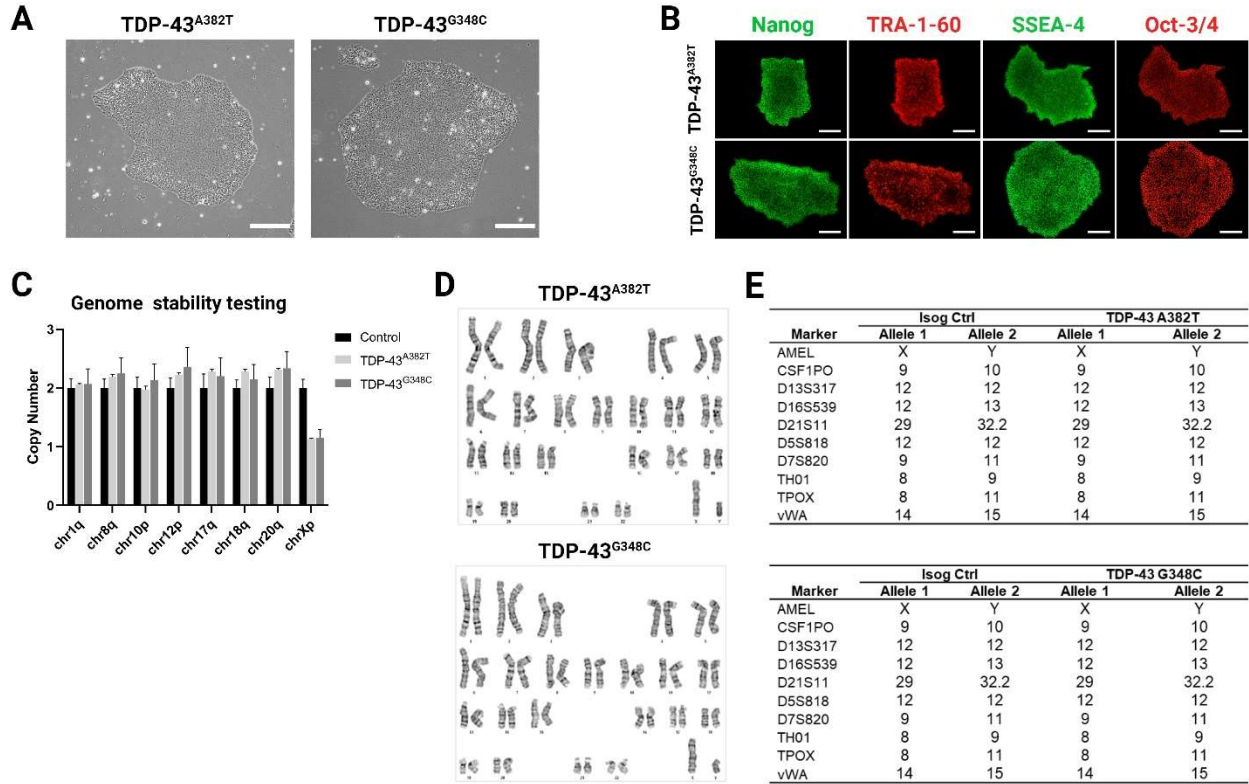

**Figure S2. Characterization of *TARDBP* knock-in iPSCs. Related to Figure 1.**

(A) Representative phase-contrast images of *TARDBP* knock-in iPSCs. Scale bar, 250  $\mu$ m.

(B) Representative images of *TARDBP* knock-in iPSCs subjected to immunocytochemistry for pluripotency-associated markers Nanog, TRA1-60, SSEA-4, and OCT-3/4. Scale bar, 250  $\mu$ m.

(C and D) Genomic stability analyses. *TARDBP* knock-in iPSC lines have normal chromosome copy numbers, as assessed by qPCR. Data shown as mean  $\pm$  SEM of technical triplicates. The control used here was provided by the manufacturer of the genome stability testing kit (C). Edited iPSC lines display normal G-banded karyotypes (D).

(E) STR analysis confirming the isogeneity of *TARDBP* knock-in iPSCs with the parental control line (AIW002-02).

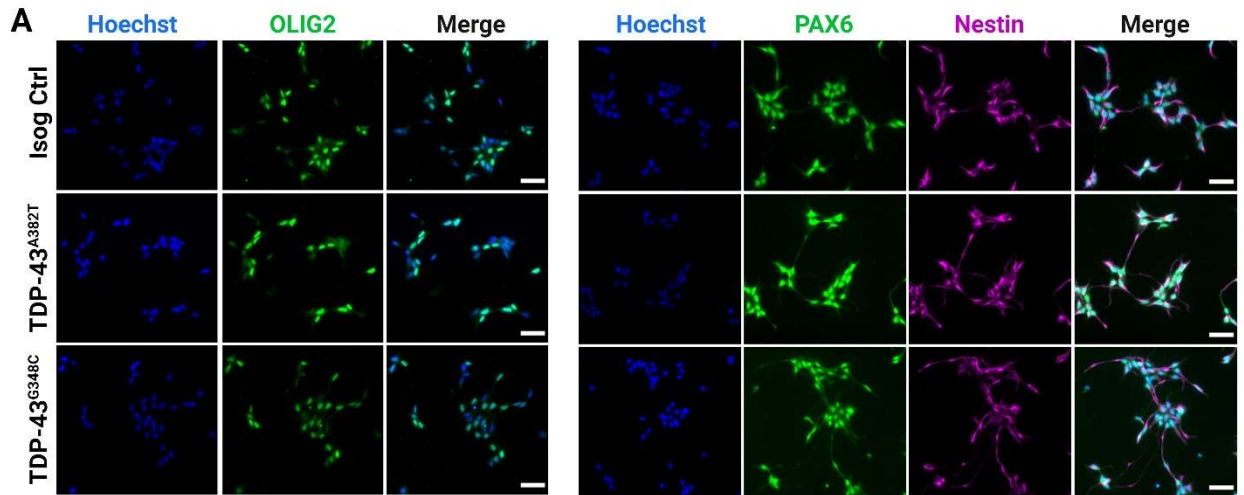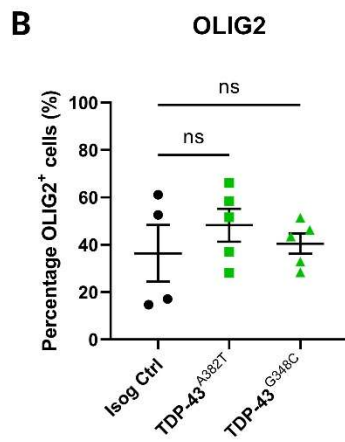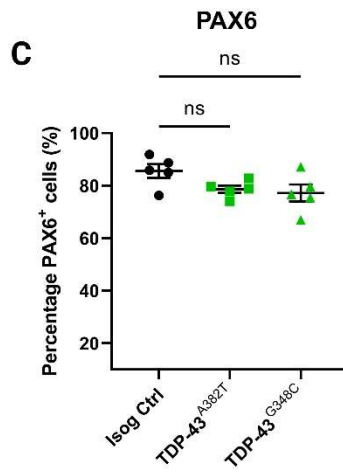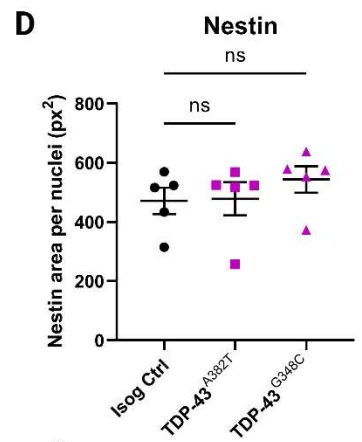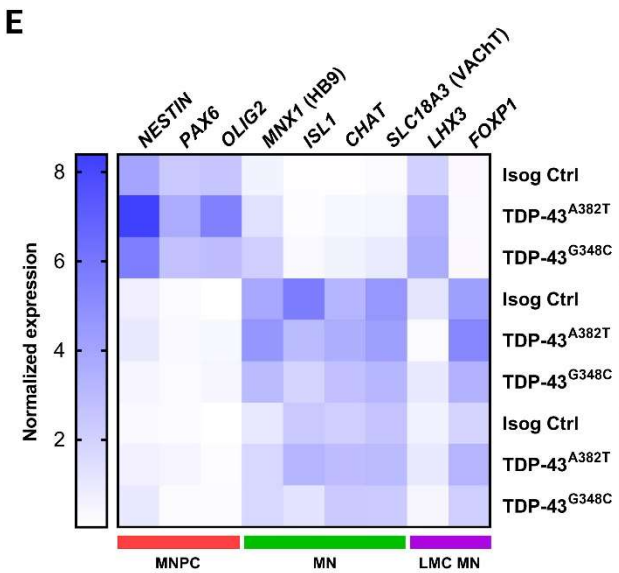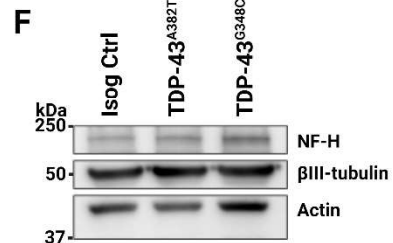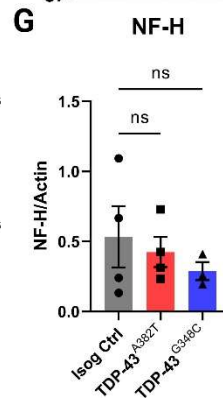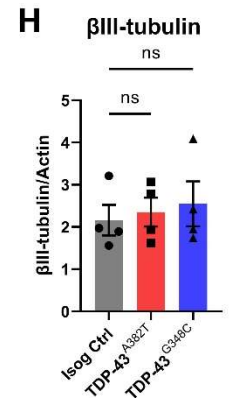

**Figure S3. Characterization of iPSC-derived MNPCs and MNs. Related to Figures 1 and 2.**

(A-D) Representative images (A) and quantification of MNPCs differentiated from iPSCs subjected to immunocytochemistry for common MNPC markers OLIG2 (B), PAX6 (C), and Nestin (D). Scale bar, 100  $\mu$ m. n=5 replicates from at least 2 independent inductions from iPSCs. Data shown as mean  $\pm$  SEM.

(E) qPCR heatmap showing normalized transcripts levels of MNPC (red), MN (green), and LMC (magenta) markers during differentiation of MNPCs into MNs. Mean plotted. n=3 independent experiments.

(F-H) Immunoblot (F) and quantification of total levels of neurofilament heavy (NF-H) (G) and  $\beta$ III-tubulin (H). Actin was used as loading control. Extractions were performed in MNs harvested after 6 weeks post-plating. n=4 independent experiments. Data shown as mean  $\pm$  SEM. Ordinary one-way.

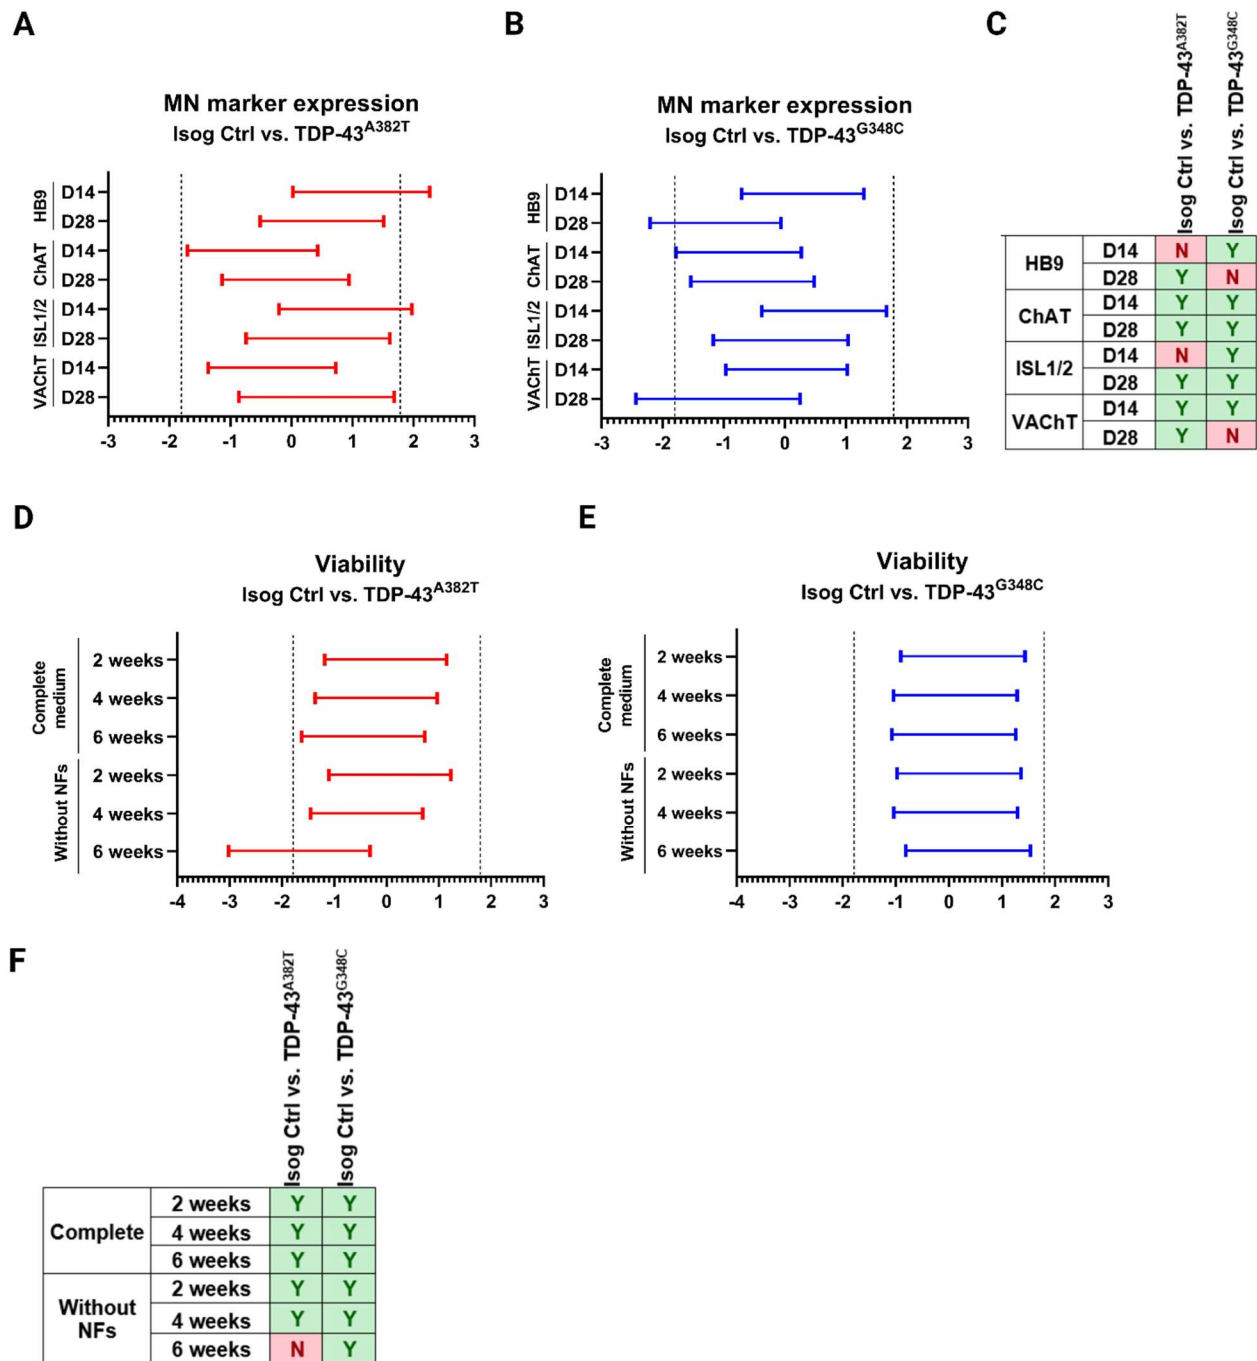

**Figure S4. Equivalence testing with confidence intervals. Related to Figures 1 and 2.**

(A-C) 90% confidence intervals with equivalence bounds  $\Delta_L = -1.8$  and  $\Delta_U = 1.8$  for comparisons of MN marker expression by immunocytochemistry in TDP-43<sup>A382T</sup> MNs (A) or TDP-43<sup>G348C</sup> MNs (B) compared with isogenic control MNs after 2-weeks (D14) and 4-weeks (D28) of final differentiation, with results summary (Equivalence Yes/No) (C).

(E-F) 90% confidence intervals with equivalence bounds  $\Delta_L = -1.8$  and  $\Delta_U = 1.8$  for comparisons of MN viability in TDP-43<sup>A382T</sup> MNs (E) or TDP-43<sup>G348C</sup> MNs (F) compared with isogenic control MNs at 2-, 4- and

6-weeks of final differentiation in medium with or without neurotrophic factor (NF) supplementation, with results summary (Equivalence Yes/No) (F).



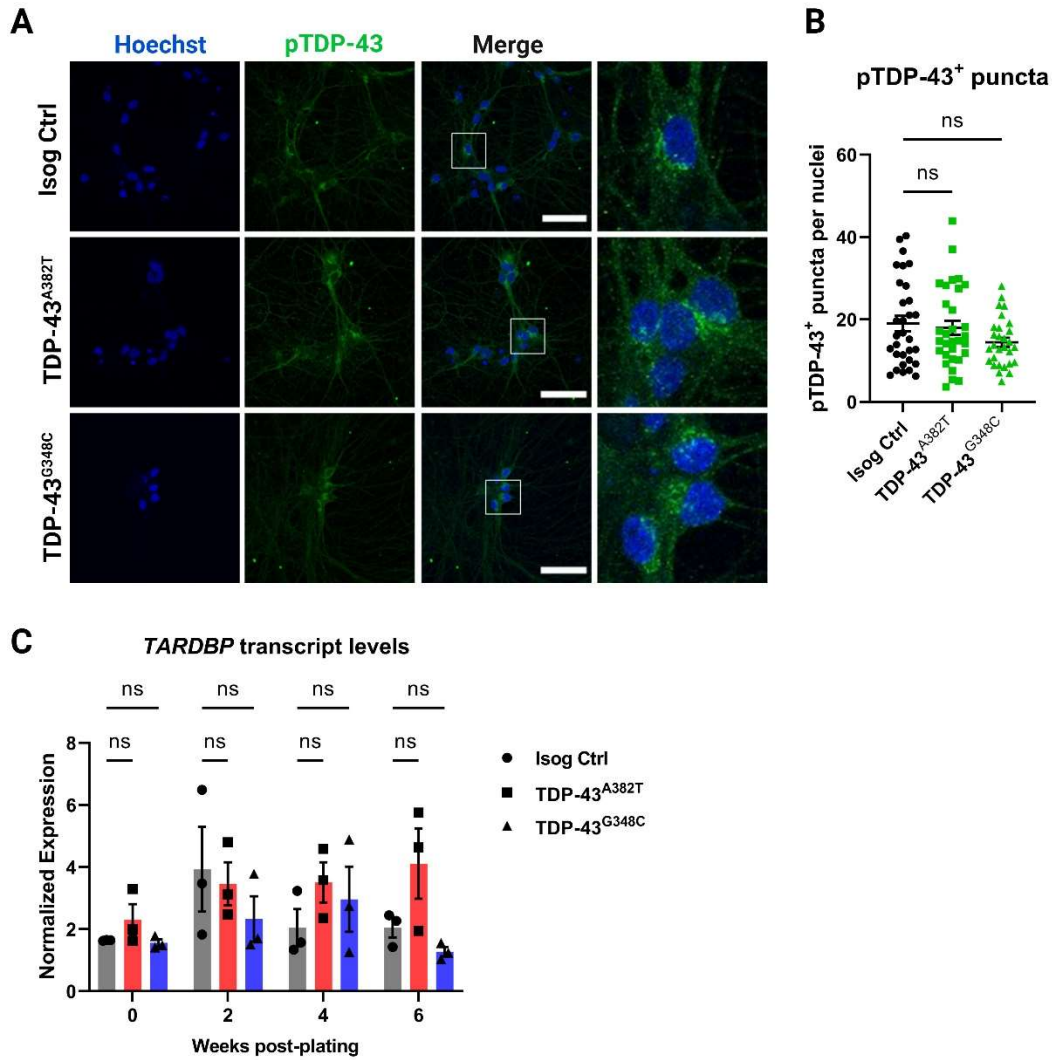

**Figure S5. Mutant MNs do not accumulate *TARDBP* transcripts or phosphorylated TDP-43. Related to Figure 3.**

(A) Representative images MNs differentiated for 6 weeks subjected to immunocytochemistry for phosphorylated TDP-43 (Ser409/410) showing punctate cytosolic staining. Scale bar, 50  $\mu$ m.

(B) Quantification of pTDP-43<sup>+</sup> puncta. Individual data points represent per-frame mean values from 5 independent experiments. Ordinary one-way ANOVA.

(C) Relative transcript levels of *TARDBP* at several timepoints determine by qPCR. n=3 independent experiments. Two-way ANOVA.

All data shown as mean  $\pm$  SEM.

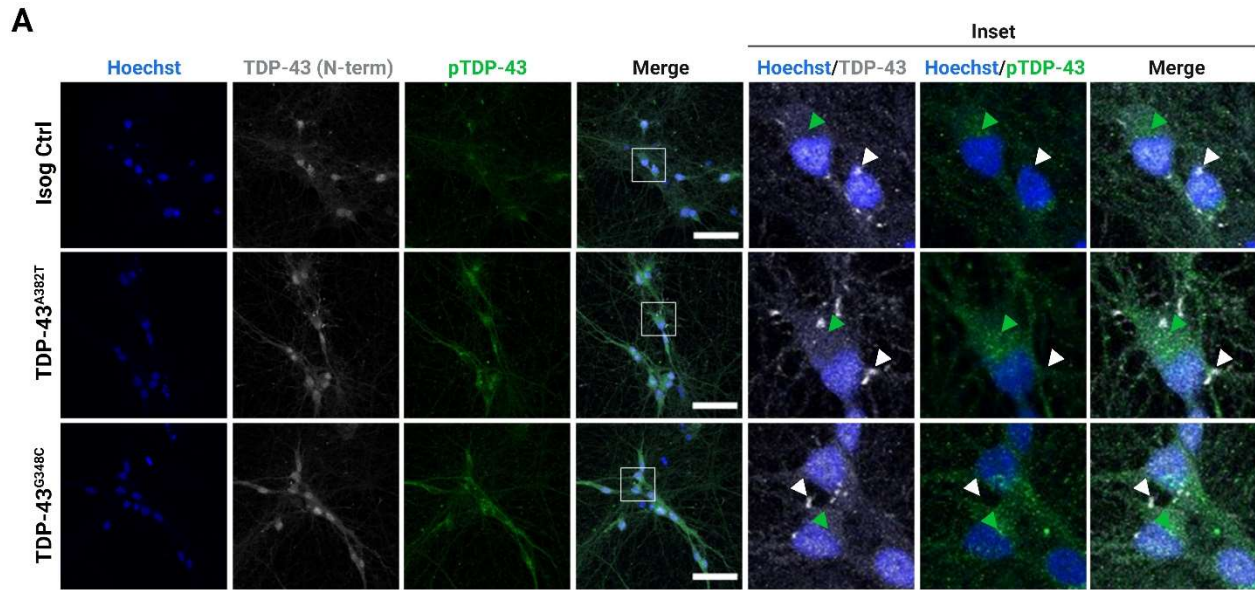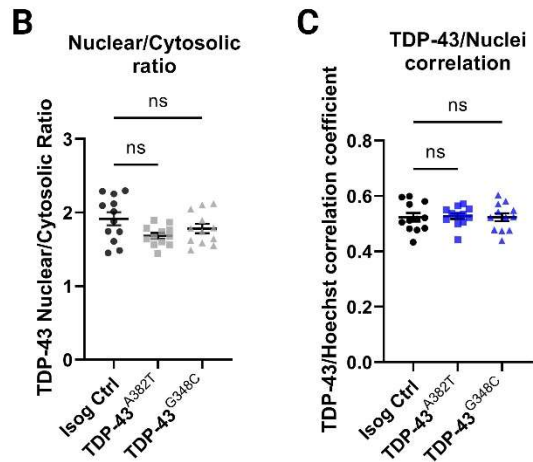

**Figure S6. TDP-43 variants do not exhibit changes in nucleocytoplasmic localization. Related to Figure 4.**

(A) Representative immunostainings of MNs differentiated for 6 weeks with an antibody targeted to the N-terminus of TDP-43 showing TDP-43 subcellular distribution and cytosolic TDP-43<sup>+</sup> puncta. TDP-43<sup>+</sup> puncta (white arrows) do not colocalize with pTDP-43<sup>+</sup> puncta (green arrows). Scale bar, 50  $\mu$ m.

(B and C) Quantification of TDP-43 distribution using the nuclear/cytosolic ratio of TDP-43 fluorescence signal intensity (B) and the TDP-43/Hoechst correlation coefficient (C). Individual data points represent per-frame mean values from 2 independent experiments. Data shown as mean  $\pm$  SEM. Ordinary one-way ANOVA.

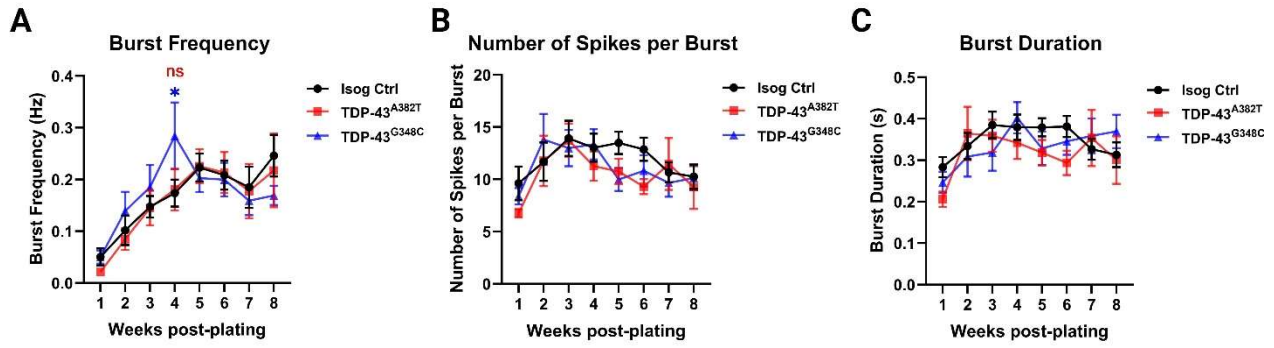

**Figure S7. Supplemental neuronal activity measurements recorded using multielectrode array. Related to Figure 5.**

(A-C) Longitudinal changes in burst frequency (A), number of spikes per burst (B), and burst duration (C) of MN cultures recorded weekly over a span of 8 weeks. n=11 independent experiments. All data shown as mean  $\pm$  SEM. \* $p < 0.05$ . Two-way ANOVA.

## Supplemental Tables

**Table S1. Overview of iPSC lines used. Related to STAR Methods.**

| Cell line ID                  | ALS mutation | Sex  | Age | Ethnicity | Primary cell line | Reprogramming method |
|-------------------------------|--------------|------|-----|-----------|-------------------|----------------------|
| AIW002-02                     | None         | Male | 37  | Caucasian | PBMC              | Sendai virus         |
| <i>TARDBP</i> A382T/AIW002-02 | p.A382T      | Male | 37  | Caucasian | Knock-in          | n/a                  |
| <i>TARDBP</i> G348C/AIW002-02 | p.G348C      | Male | 37  | Caucasian | Knock-in          | n/a                  |

\* PBMC, peripheral blood mononuclear cell; n/a, not applicable.

**Table S2. Sequences of sgRNAs and ssODNs used in making of *TARDBP* knock-in iPSC lines. Related to STAR Methods.**

| Cell line ID                     | gRNA                 | ssODN template                                                                                                  |
|----------------------------------|----------------------|-----------------------------------------------------------------------------------------------------------------|
| <i>TARDBP</i><br>A382T/AIW002-02 | UCUAAUUCUGGUGCAGCAAU | GGCCTTCGGTTCTGGAAATAACTCTTATAGTGGCTCT<br>AATTCTGGTGCAACAATCGGTTGGGGATCAGCATCC<br>AATGCAGGGTCGGGCAGTGGTTTTAATGG  |
| <i>TARDBP</i><br>G348C/AIW002-02 | GCCAGCCAGCAGAACCAGUC | GAGCAGTTGGGGTATGATGGGCATGTTAGCCAGCC<br>AGCAGAACCAGTCATGCCATCGGGTAATAACCAAA<br>ACCAAGGCAACATGCAGAGGGAGCCAAACCAGG |

**Table S3. List of primers and affinity probes used for ddPCR or Sanger sequencing. Related to STAR Methods.**

|                     | <i>TARDBP</i> A382T/AIW002-02 | <i>TARDBP</i> G348C/AIW002-02 |
|---------------------|-------------------------------|-------------------------------|
| probe-HEX (WT)*     | ATT+G+C+TG+CA+CC              | AGTC+A+G+GC+CC                |
| probe-FAM (Mutant)* | ATT+G+T+TG+C+AC+CA            | AG+TC+A+T+GC+CCAT             |
| ddPCR primer-F      | CTTCGGTTCTGGAAATAACTCTTATAG   | TTAGCCAGCCAGCAGAA             |
| ddPCR primer-R      | CCCAGCCAGAAGACTTAGAA          | GTTATTTCCAGAACCGAAGGC         |
| Sanger seq primer-F | GCTTTGGGAATCAGGGTGGGA         | GCTTTGGGAATCAGGGTGGGA         |
| Sanger seq primer-R | ACTCCACACTGAACAAACCA          | ACTCCACACTGAACAAACCA          |

\* "+" signs in front of nucleotides indicate the location of Locked Nucleic Acids (LNA®).

**Table S4. List of TaqMan probes.  
Related to STAR Methods.**

| <b>Gene</b>   | <b>Reference</b> |
|---------------|------------------|
| ACTB          | Hs01060665_g1    |
| GAPDH         | Hs02786624_g1    |
| NES           | Hs04187831_g1    |
| PAX6          | Hs01088114_m1    |
| OLIG2         | Hs00377820_m1    |
| MNX1/HB9      | Hs00907365_m1    |
| ISL1          | Hs00158126_m1    |
| CHAT          | Hs00758143_m1    |
| SLC18A3/VACht | Hs00268179_s1    |
| LHX3          | Hs01033412_m1    |
| FOXP1         | Hs00212860_m1    |
| TARDBP        | Hs00606522_m1    |
| DLG4/PSD95    | Hs01555373_m1    |
| SYN1          | Hs00199577_m1    |
| SYP           | Hs00300531_m1    |
